# Supplementary material for: Human Placental NADPH Oxidase Mediates sFlt-1 and PlGF Secretion in Early Pregnancy: Exploration of the TGF-β1/p38 MAPK Pathways
Source: PubMed Central journal article supplement (PMC7918586; doi:10.3390/antiox10020281), 2021-02-12
Supplement: antioxidants-10-00281-s001.pdf [file antioxidants-10-00281-s001.pdf]

# Supplementary Material S1: p38/phospho-p38 Western blots: kinetic

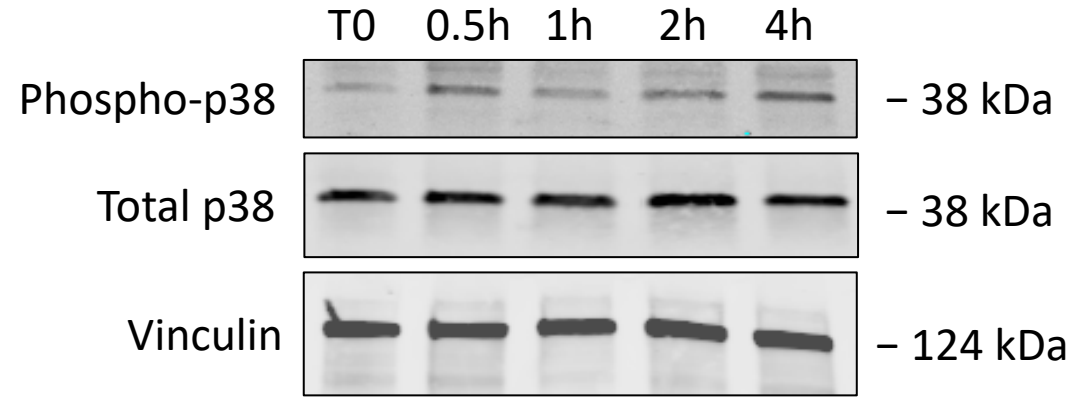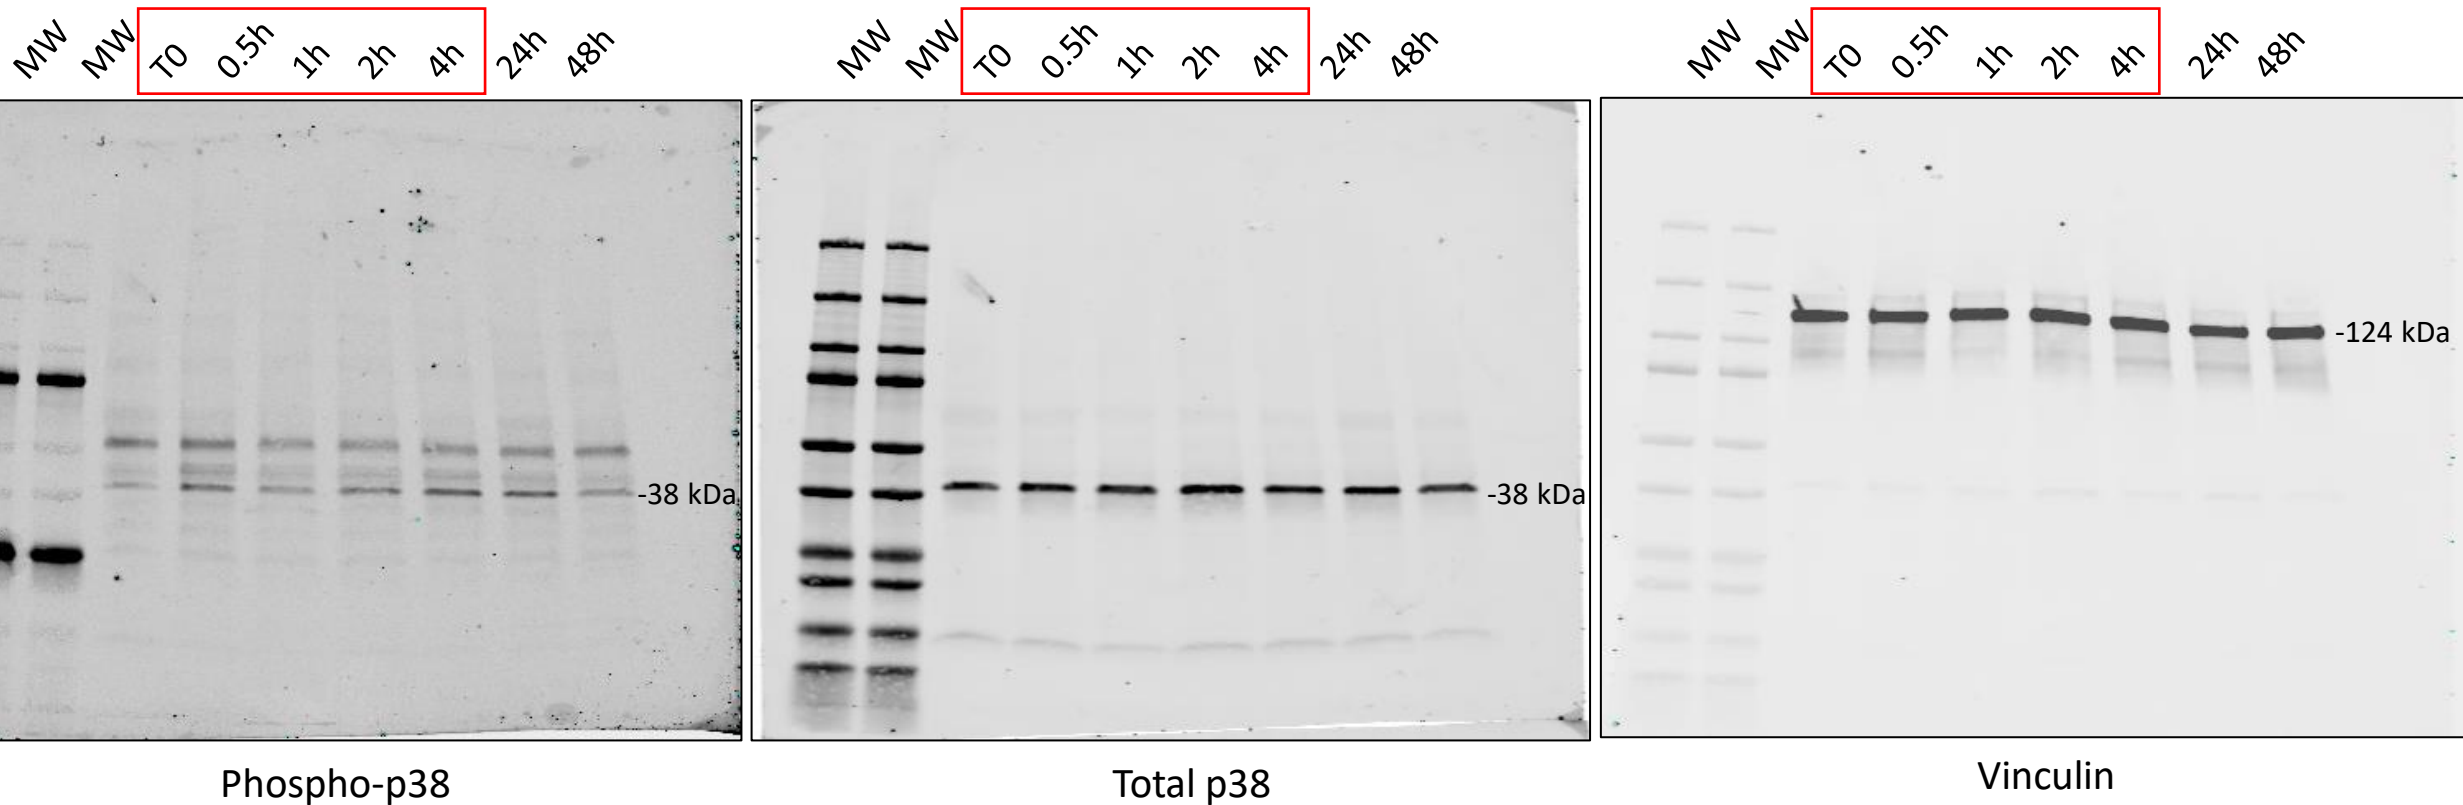

Abbreviations: kDa: kilodalton, MW: molecular weight, phospho-p38: phosphorylated p38 MAPK protein, total p38: total p38 MAPK protein, T0: time zero

## Supplementary Material S2: p38/phospho-p38 Western blots

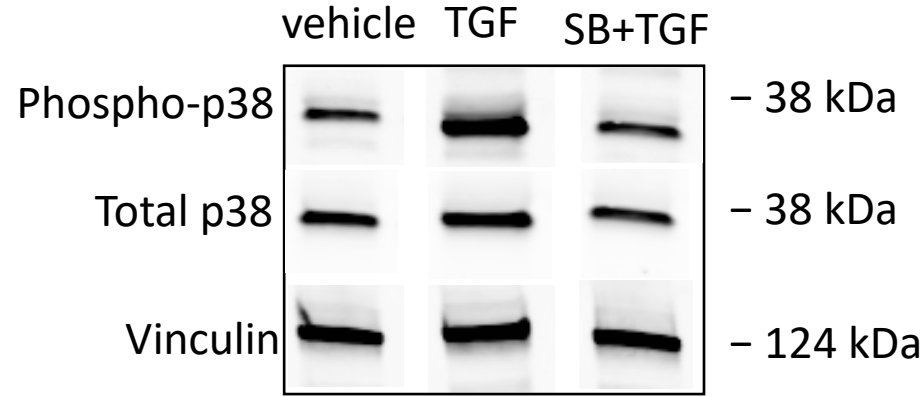

SB 10: SB203580 10  $\mu\text{g}/\text{mL}$   
 SB 20: SB203580 20  $\mu\text{g}/\text{mL}$   
 SB10+TGF: SB203580 10  $\mu\text{g}/\text{mL}$  + TGF- $\beta$ 1 10 ng/mL  
 SB20+TGF: SB203580 10  $\mu\text{g}/\text{mL}$  + TGF- $\beta$ 1 20 ng/mL

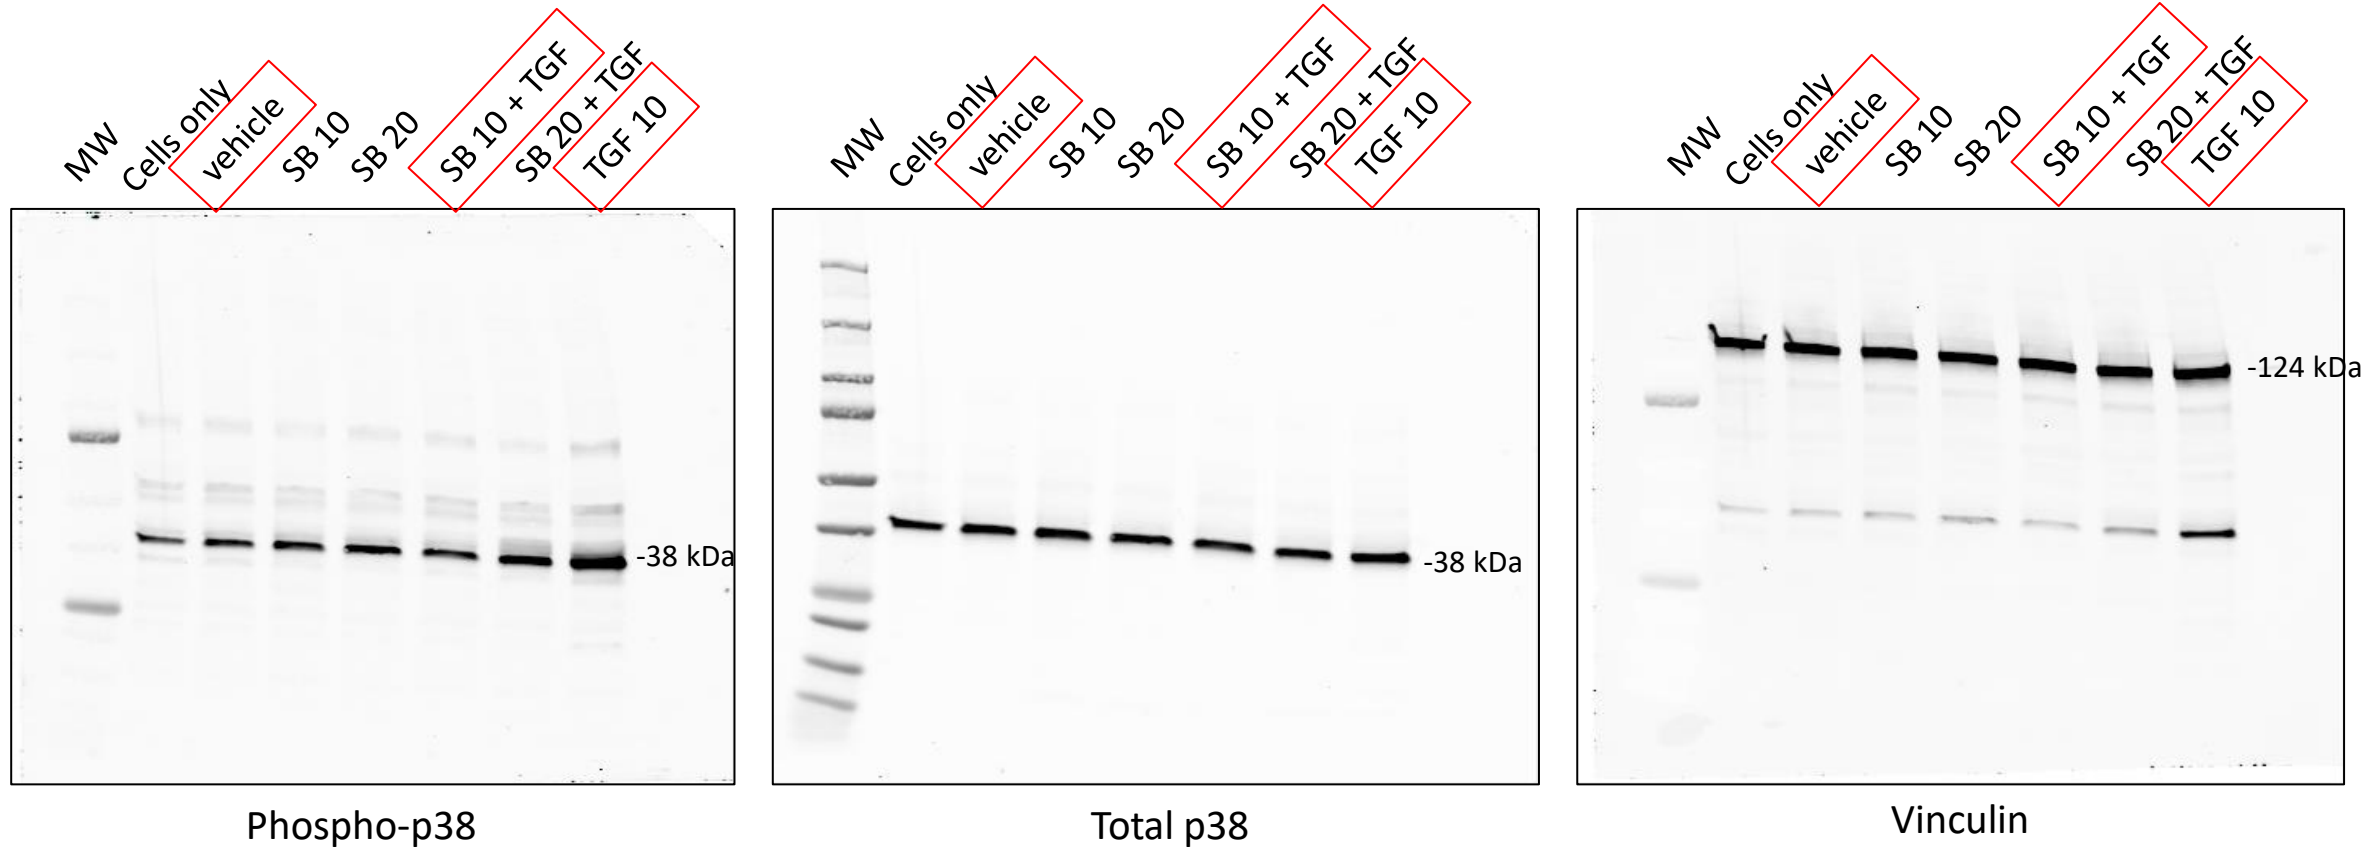

Abbreviations: kDa: kilodalton, MW: molecular weight, phospho-p38: phosphorylated p38 MAPK protein, SB: SB203580, TGF- $\beta$ 1: Transforming Growth Factor beta 1, total p38: total p38 MAPK protein

# Supplementary Material S3: SMAD2/phospho-SMAD2 Western blots: kinetic

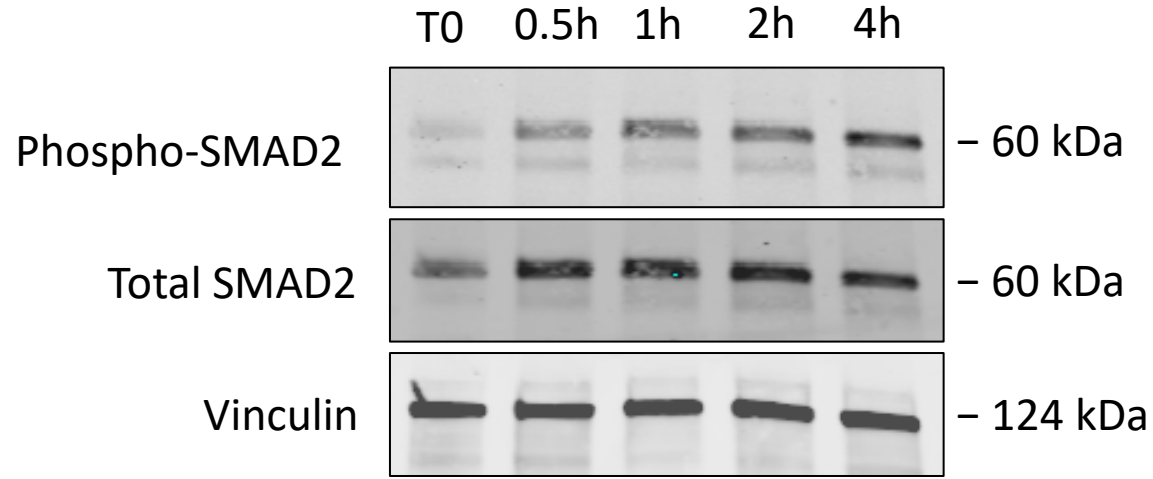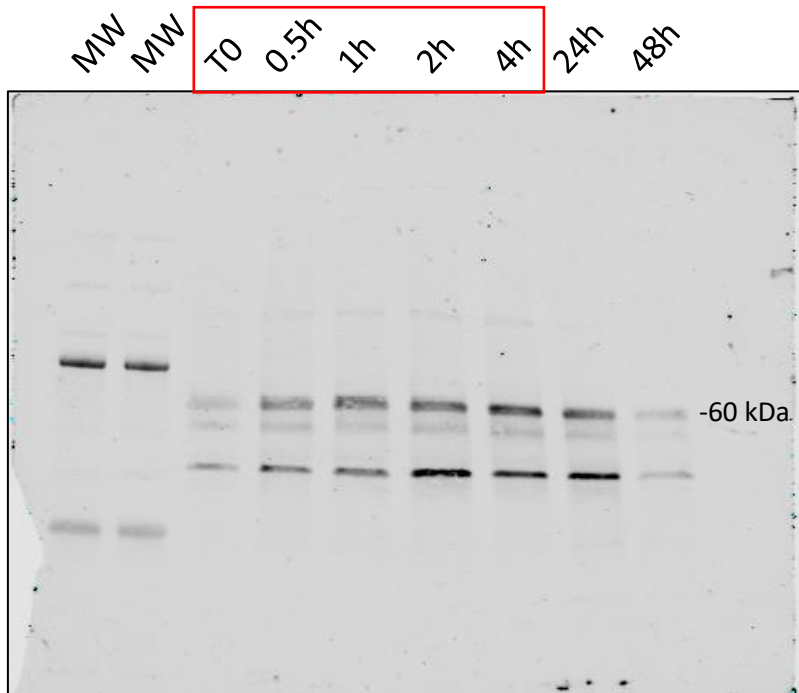

Phospho SMAD2

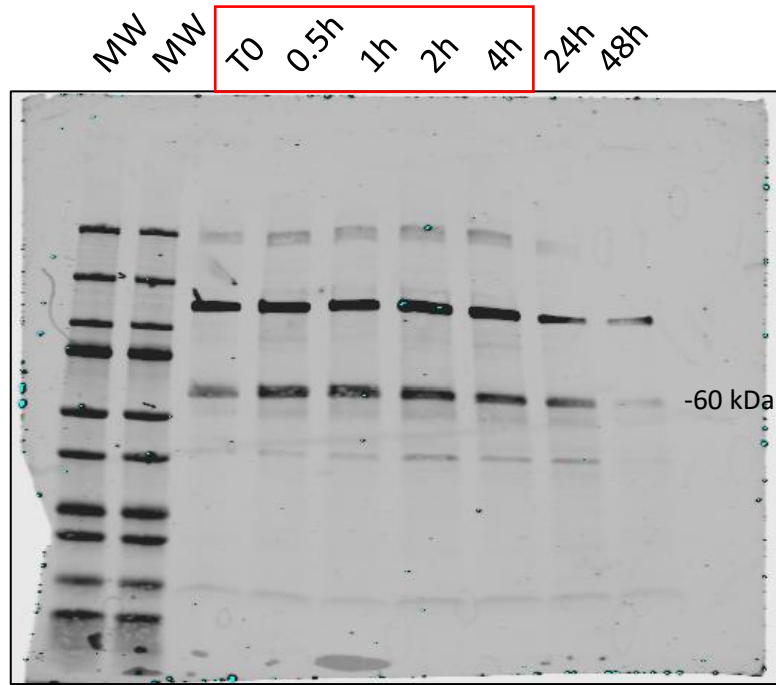

Total SMAD2

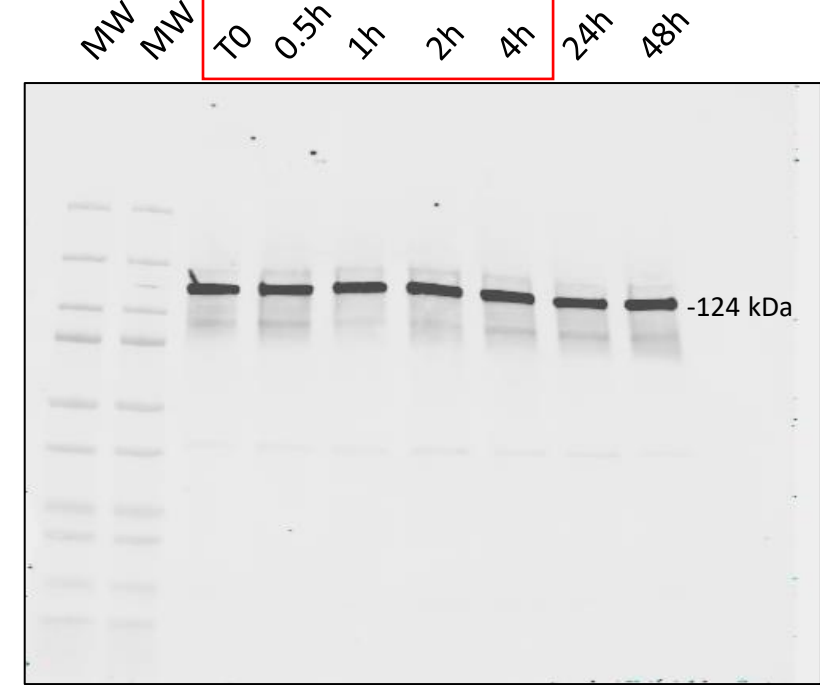

Vinculin

## Supplementary Material S4: SMAD2/phospho-SMAD2 Western blots

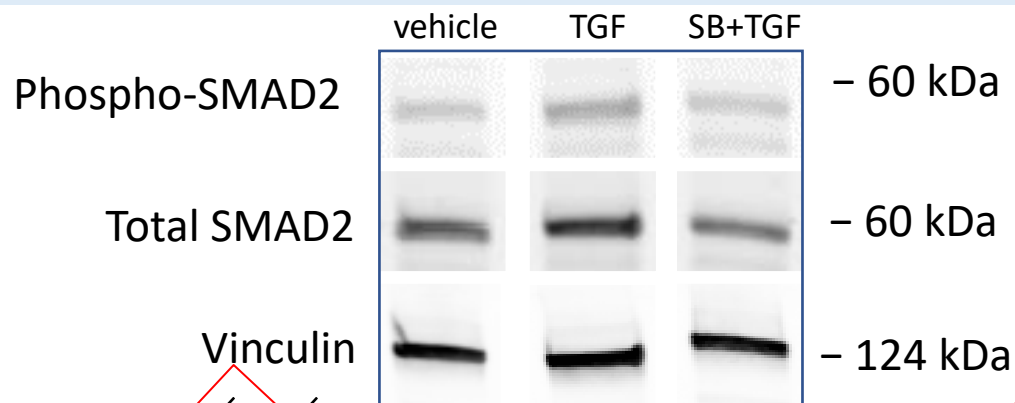

SB 10: SB203580 10  $\mu\text{g}/\text{mL}$   
 SB 20: SB203580 20  $\mu\text{g}/\text{mL}$   
 SB10+TGF: SB203580 10  $\mu\text{g}/\text{mL}$  + TGF- $\beta$ 1 10 ng/mL  
 SB20+TGF: SB203580 10  $\mu\text{g}/\text{mL}$  + TGF- $\beta$ 1 20 ng/mL

MW  
 Cells only  
 vehicle  
 SB 10  
 SB 20  
 SB 10 + TGF  
 SB 20 + TGF  
 TGF 10

MW  
 Cells only  
 vehicle  
 SB 10  
 SB 20  
 SB 10 + TGF  
 SB 20 + TGF  
 TGF 10

MW  
 Cells only  
 vehicle  
 SB 10  
 SB 20  
 SB 10 + TGF  
 SB 20 + TGF  
 TGF 10

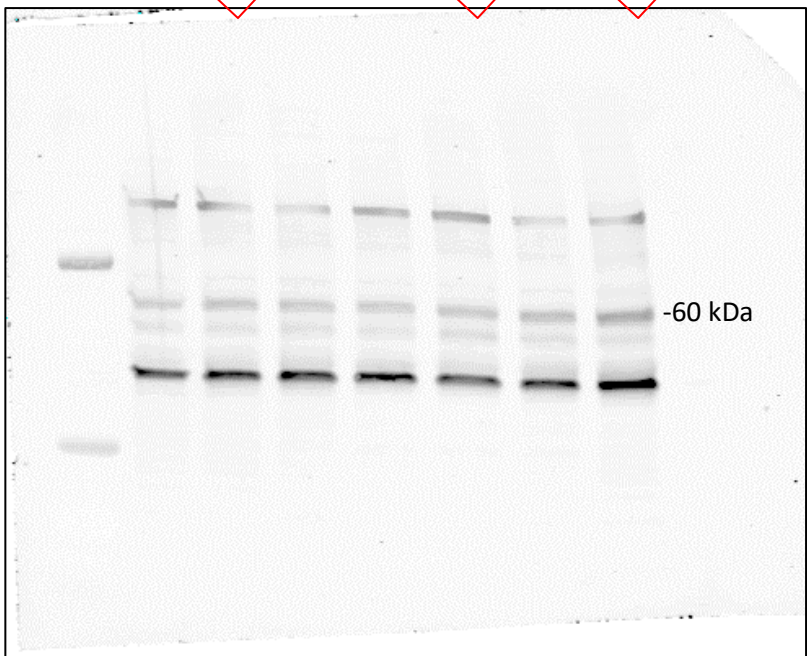

Phospho SMAD2

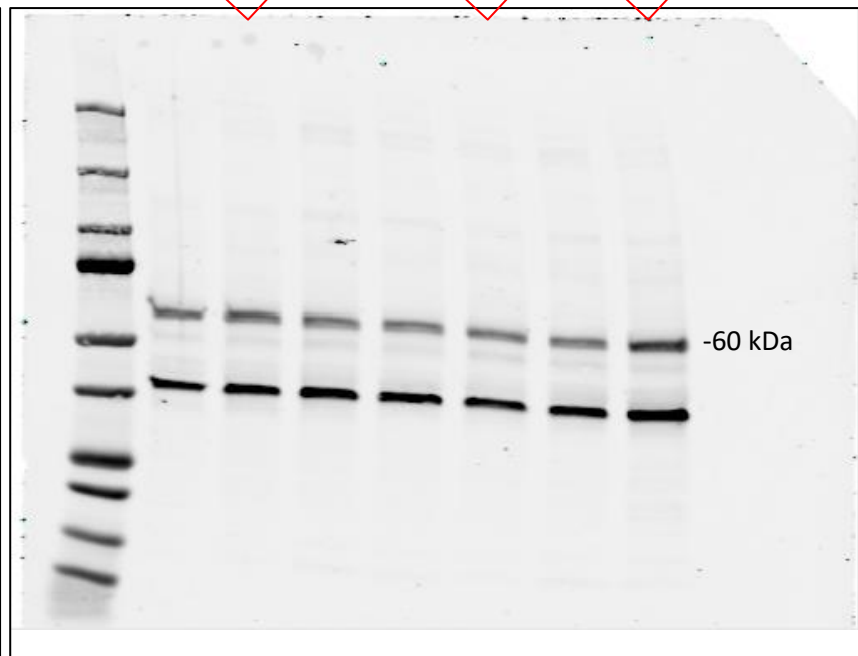

Total SMAD2

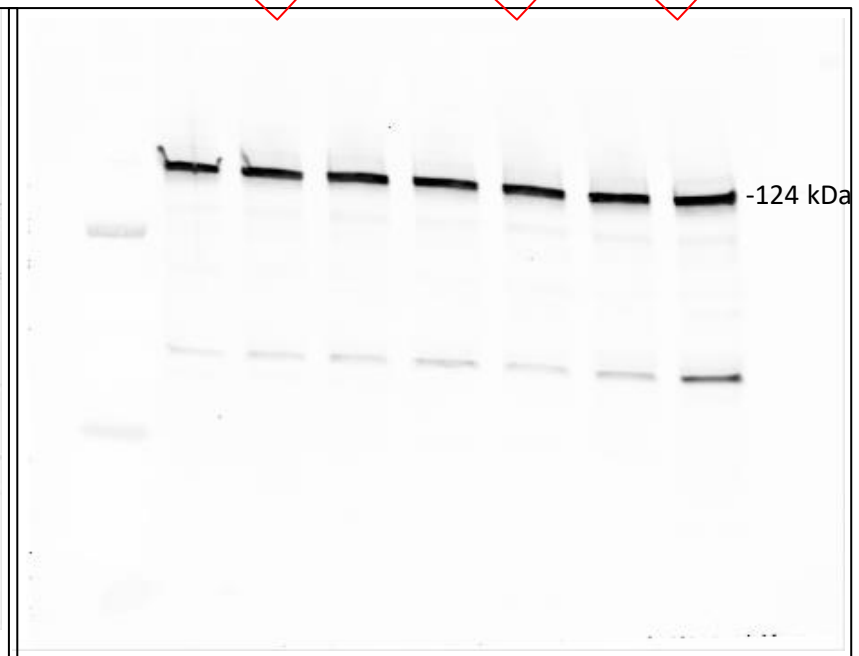

Vinculin
